# Supplementary material for: Effects of the Gut Microbiota and Barrier Function on Melatonin Efficacy in Alleviating Liver Injury
Source: MDPI journal article supplement (doi:10.3390/antiox11091727), 2022-08-31
Supplement: s1 [file s1]

Table S1 Primer sequences used in the real-time PCR

| Gene           | Sequences (5'–3')                                         | GenBank accession number |
|----------------|-----------------------------------------------------------|--------------------------|
| CAT            | F: CCTCGTTCAGGATGTGGT TT<br>R: TCTGGTGATATCGTGGGTGA       | NM_009804                |
| GPx1           | F: CCTCAAGTACGTCCGACCTG<br>R: CAATGTCGTTGCGGCACACC        | NM_001329528.1           |
| SOD2           | F: GGCTGGCTTGGCTTCAATAA<br>R: GCGGAATAAGGCCTGTTGTT        | NM_013671.3              |
| P53            | F: TACAAGAAGTCACAGCACAT<br>R: GATAGGTCGGCGGTTTCAT         | AB020317.1               |
| Bax            | F: TGGAGATGAACTGGACAGCAATAT<br>R: GCAAAGTAGAAGAGGGCAACCAC | NM_007527.3              |
| Bcl2           | F: CATTATCAATGATGTACCATG<br>R: GCAGTAAATAGCTGATTCGAC      | NM_009741.3              |
| Caspase 3      | F: CAAAGCGCAGTGTCTCTGCGG<br>R: ACCCCGGCAGGCCTGAATGA       | NM_009810.3              |
| TLR-4          | F: TTTGCTGGGGCTCATTCCT<br>R: GACTCGGCACTTAGCACTGT         | NM_021297.3              |
| IL-1 $\beta$   | F: CCTGGGCTGTCTCTGATGAGAG<br>R: TCCACGGGAAAGACACAGGTA     | NM_008361.4              |
| NF- $\kappa$ B | F: GGCCCTAAAGATTGTGCCAAG<br>R: AGCAACATCTTCACATCCCCC      | NM_008689.2              |
| TNF- $\alpha$  | F: TGGGACAGTGACCTGGACTGT<br>R: TTCGGAAAGCCCATTTGAGT       | NM_013693.2              |
| PERK           | F: CACGCAGATCACAGTCAGGT<br>R: GGGCTGAGGATGGAAAAGCC        | NM_010121.3              |
| IRE1           | F: TTTAGCTTTGCCGACCGTGA<br>R: TGCACACAGCTCGATAGCAA        | NM_023913.2              |

---

|               |                                                           |                |
|---------------|-----------------------------------------------------------|----------------|
| GRP78         | F: ATCGTGCCTCTCATTGGTGG<br>R: TAGTTGGAGGCCGCTGATTG        | U16277.1       |
| ATF6          | F: ATGGGTTCGGATATCGCTGT<br>R: TTCTTCTTCTTGCGCGACTG        | NM_001081304.1 |
| CHOP          | F: AGTGCATCTTCATACACCACCACA<br>R: CAGATCCTCATACCAGGCTTCCA | NM_007837.4    |
| FAS           | F: CCTCGTGATGAACGTGTACC<br>R: TGAGGACGTTTACAAAGGCA        | NM_007988.3    |
| ACC           | F: GCCAGTGCTATGCTGAGATTGAG<br>R: CTATCACACAGCCAGGGTCAAGT  | NM_133360.2    |
| CD36          | F: GAACCTATTGAAGGCTT ACATCC<br>R: CCCA GTCACTTGTGTTTTGAAC | NM_001159557.1 |
| CPT1 $\alpha$ | F: GACTCCGCTCGCTCATTCC<br>R: ACCAGTGATGATGCCATTCTTG       | NM_013495.2    |
| SREBP-1c      | F: AGAGCGAGCGTTGAACTGTATT<br>R: ATCCAAGGGCATCTGAGAACTC    | NM_011480.3    |
| PPAR $\alpha$ | F: TGCATGTCCGTGGAGACCGTCAC<br>R: ACTCGGTCTTCTTGATGACC     | NM_001113418.1 |
| PPAR $\gamma$ | CCTGGCAAAGCATTTGTATG<br>TGGTGATTTGTCCGTTGTCT              | NM_001127330.1 |
| SCD-1         | F: CTACACCTGCCTCTTCGGGATT<br>R: CCGTGCCTTGTAAGTTCTGTG     | NM_009127.4    |
| ULK1          | F: AGTTCTGGAGATTGCAGCCC<br>R: ACCACACTTTCCTGGAGCTG        | NM_009469.3    |
| LC3           | F: CCTGGACAAGACCAAGTTCC<br>R: GTCTCCTGCGAGGCATAAAC        | NM_026160.4    |
| ATG5          | F: TTGAGTCAGGACAACGAGGC<br>R: TTCTCCTCCTTGGCTTGCAG        | NM_001314013.1 |

---

|                |                                                            |                |
|----------------|------------------------------------------------------------|----------------|
| Beclin1        | F: GAAACTGGACACGAGCTTCAAGA<br>R: ACCATCCTGGCGAGTTTCAATA    | NM_001034117.1 |
| PINK1          | F: GCTTTGGCTGGAGAGTATGG<br>R: CGGATGATGTTAGGGTGTGG         | NM_026880.2    |
| Parkin         | F: ACACAGACAGTAAGAGGGATTTCAGAA<br>R: GTGAGGGTTGCTTGTTTGCA  | NM_001317726.1 |
| ZO-1           | F: ATGGAAAGCTGGGCTCTTGGCT<br>R: ACCACCCGCTGTCTTTGGAAGT     | D14340.1       |
| Occludin       | F: TTCAGGTGAATGGGTCACCG<br>R: AGATAAGCGAACCTGCCGAG         | NM_001360536.1 |
| Claudin-1      | F: AGACCTGGATTTGCATCTTGGTG<br>R: TGCAACATAGGCAGGACAAGAGTTA | NM_016674.4    |
| $\beta$ -actin | F: AGCCATGTACGTAGCCATCC<br>R: CTCTCAGCTGTGGTGGTGAA         | NM007393       |

CAT, catalase; GPx1, glutathione peroxidase 1; SOD2, superoxide dismutase 2; Bax, Bcl-2-associated X protein; Bcl-2, B-cell lymphoma/leukaemia 2; TLR, toll-like receptor; IL, interleukin, TNF- $\alpha$ , tumor necrosis factor  $\alpha$ ; NF- $\kappa$ B, nuclear factor kappa B (p65); PERK, protein kinase R-like endoplasmic reticulum kinase; IRE1, inositol-requiring enzyme 1; GRP78, glucose-regulated protein 78; ATF6, activating transcription factor 6; CHOP, CCAAT/enhancer-binding protein homologous protein; FAS, fatty acid synthase; ACC, Acetyl-CoA carboxylase; CPT1 $\alpha$ , carnitine palmitoyltransferase 1 $\alpha$ ; SREBP-1c, Sterol regulatory element binding protein-1c; PPAR $\alpha$ , peroxisome proliferator-activated receptor  $\alpha$ ; PPAR $\gamma$ , Peroxisome proliferator-activated receptor gamma; SCD-1, stearoyl-CoA desaturase-1; ZO-1, zonula occludens-1; LC3, microtubule-associated protein light chain 3; ULK1, unc-51 like autophagy activating kinase 1; PINK1, PTEN induced putative kinase 1; ATG5, autophagy related 5; F, forward; R, reverse.

Table S2 Details of antibodies used for western blotting in this study

| Antibodies         | Cat NO.    | Source                             | Dilutions of Western blot |
|--------------------|------------|------------------------------------|---------------------------|
| anti-GPx1          | ab59546    | Abcam (MA, USA)                    | 1:1000                    |
| anti-CAT           | 20225-1-AP | Protein Tech (CHI, USA)            | 1:1000                    |
| anti-P53           | 11897-1-AP | Protein Tech (CHI, USA)            | 1:1000                    |
| anti-SOD2          | NB100-1992 | Novus (CO, USA)                    | 1:2000                    |
| anti-Bcl2          | Ab56361    | Abcam (MA, USA)                    | 1:1000                    |
| anti-CHOP          | CS19116    | Cell Signaling (MA, USA)           | 1:1000                    |
| anti-Caspase 3     | CS16843    | Cell Signaling (MA, USA)           | 1:1000                    |
| anti-Bax           | CS20819    | Cell Signaling (MA, USA)           | 1:1000                    |
| anti-p65           | CS20976    | Cell Signaling (MA, USA)           | 1:500                     |
| anti-pp65          | CS19807    | Cell Signaling (MA, USA)           | 1:500                     |
| anti-TNF- $\alpha$ | SC-511     | Santa Cruz Biotechnology (CA, USA) | 1:500                     |
| anti-TLR4          | Ab40975    | Abcam (MA, USA)                    | 1:1000                    |
| anti-PERK          | C33E18     | Cell Signaling (MA, USA)           | 1:1000                    |
| anti-IRE1          | ab37073    | Abcam (MA, USA)                    | 1:1000                    |
| anti-ATF6          | ab03119    | Abcam (MA, USA)                    | 1:1000                    |
| anti-GRP78         | SC-376768  | Santa Cruz Biotechnology (CA, USA) | 1:250                     |
| FAS                | 3180       | Cell Signaling (MA, USA)           | 1:1000                    |
| ACC                | 3662       | Cell Signaling (MA, USA)           | 1:1000                    |
| CPT1 $\alpha$      | ab53532    | Abcam (MA, USA)                    | 1:500                     |
| PPAR $\alpha$      | SC-130640  | Santa Cruz Biotechnology (CA, USA) | 1:1000                    |
| SREBP1c            | NB100-2215 | Novus (CO, USA)                    | 1:1000                    |
| anti-ZO-1          | SC-487     | Santa Cruz Biotechnology (CA, USA) | 1:1000                    |
| anti-claudin-1     | SC-319     | Santa Cruz Biotechnology (CA, USA) | 1:1000                    |
| anti-occludin      | SC-503     | Santa Cruz Biotechnology (CA, USA) | 1:1000                    |
| anti-LC3           | SC-489     | Santa Cruz Biotechnology (CA, USA) | 1:1500                    |

|                                        |               |                                    |        |
|----------------------------------------|---------------|------------------------------------|--------|
| anti-Parkin                            | SC-726        | Santa Cruz Biotechnology (CA, USA) | 1:1000 |
| anti-PINK1                             | SC-719        | Santa Cruz Biotechnology (CA, USA) | 1:1000 |
| anti- $\beta$ -actin                   | SC-820        | Santa Cruz Biotechnology (CA, USA) | 1:1000 |
| anti-VDAC                              | SC-513        | Santa Cruz Biotechnology (CA, USA) | 1:1500 |
| HRP-labelled                           | goat AB-98328 | Antgene Biotech (Wuhan, China)     | 1:5000 |
| anti-rabbit IgG (secondary antibodies) |               |                                    |        |

CAT, catalase; GPx1, glutathione peroxidase 1; SOD2, superoxide dismutase2; Bax, Bcl-2-associated X protein; Bcl-2, B-cell lymphoma/leukaemia 2; CHOP, CCAAT/enhancer-binding protein homologous protein; PERK, protein kinase R-like endoplasmic reticulum kinase; IRE1, inositol-requiring enzyme 1; GRP78, glucose-regulated protein 78; ATF6, activating transcription factor 6; FAS, fatty acid synthase; ACC, Acetyl-CoA carboxylase; CPT1 $\alpha$ , carnitine palmitoyl transferase 1 $\alpha$ ; SREBP-1c, Sterol regulatory element binding protein-1c; PPAR $\alpha$ , peroxisome proliferator-activated receptor  $\alpha$ ; TLR, toll-like receptor; TNF- $\alpha$ , tumor necrosis factor  $\alpha$ ; NF- $\kappa$ B, nuclear factor kappa B (p65); ZO-1, zonula occludens-1; LC3, microtubule-associated protein light chain 3; PINK1, PTEN induced putative kinase 1; HRP, horseradish peroxidase; VDAC, voltage dependent anion channel.

Table S3 Effect of melatonin supplementation on the growth performance, serum lipid metabolism indices, antioxidative capacity, LPS and cytokine concentrations in the liver in CdCl<sub>2</sub> treated mice for 10 weeks <sup>a</sup>.

| Item <sup>b</sup>                                           | CON                | Cd                  | Mel+Cd             | SEM  | P value |
|-------------------------------------------------------------|--------------------|---------------------|--------------------|------|---------|
| <b>Growth performance</b>                                   |                    |                     |                    |      |         |
| Initial weight, g                                           | 21.20              | 21.25               | 21.15              | 0.83 | 0.135   |
| Final weight, g                                             | 31.91 <sup>a</sup> | 23.67 <sup>c</sup>  | 27.92 <sup>b</sup> | 1.04 | 0.023   |
| Body weight gain, g                                         | 10.71 <sup>a</sup> | 2.42 <sup>c</sup>   | 6.77 <sup>b</sup>  | 0.79 | 0.009   |
| Liver weight, g                                             | 0.97 <sup>c</sup>  | 1.28 <sup>a</sup>   | 1.16 <sup>b</sup>  | 0.08 | 0.012   |
| Liver index, %                                              | 3.04 <sup>c</sup>  | 5.39 <sup>a</sup>   | 4.15 <sup>b</sup>  | 0.49 | 0.007   |
| <b>Serum enzyme activities and Lipid metabolism indices</b> |                    |                     |                    |      |         |
| Serum ALB, g/L                                              | 46.16 <sup>a</sup> | 30.33 <sup>c</sup>  | 39.18 <sup>b</sup> | 2.99 | 0.013   |
| Serum ALP, U/L                                              | 54.18 <sup>c</sup> | 101.21 <sup>a</sup> | 69.21 <sup>b</sup> | 3.12 | 0.007   |
| Serum TG, mM                                                | 0.62 <sup>c</sup>  | 1.34 <sup>a</sup>   | 0.86 <sup>b</sup>  | 0.08 | 0.031   |
| Serum TCHO, mM                                              | 3.02 <sup>c</sup>  | 5.69 <sup>a</sup>   | 4.18 <sup>b</sup>  | 0.58 | 0.007   |
| Serum HDL, mM                                               | 2.13               | 2.08                | 2.19               | 0.37 | 0.231   |
| Serum LDL, mM                                               | 0.83 <sup>c</sup>  | 1.39 <sup>a</sup>   | 1.05 <sup>b</sup>  | 0.07 | 0.006   |
| Serum glucose, mM                                           | 3.12 <sup>c</sup>  | 6.98 <sup>a</sup>   | 4.68 <sup>b</sup>  | 0.47 | 0.019   |
| Serum insulin, μU/mL                                        | 8.18 <sup>c</sup>  | 15.27 <sup>a</sup>  | 12.82 <sup>b</sup> | 1.02 | 0.008   |
| HOMA-IR                                                     | 1.13 <sup>c</sup>  | 4.74 <sup>a</sup>   | 2.67 <sup>b</sup>  | 0.27 | 0.013   |
| Liver CPT1 activity, μmol/min/mg                            | 5.43 <sup>a</sup>  | 2.78 <sup>c</sup>   | 3.69 <sup>b</sup>  | 0.39 | 0.009   |
| Liver TG, μmol/g                                            | 6.93 <sup>c</sup>  | 13.28 <sup>a</sup>  | 9.19 <sup>b</sup>  | 0.41 | 0.014   |
| <b>Antioxidative capacity</b>                               |                    |                     |                    |      |         |

|                                              |                    |                    |                    |      |       |
|----------------------------------------------|--------------------|--------------------|--------------------|------|-------|
| GSH-Px, U/mg prot                            | 40.12 <sup>a</sup> | 22.47 <sup>c</sup> | 31.35 <sup>b</sup> | 1.37 | 0.028 |
| SOD, U/mg prot                               | 54.27 <sup>a</sup> | 32.49 <sup>c</sup> | 43.21 <sup>b</sup> | 1.89 | 0.012 |
| T-AOC, U/mg prot                             | 5.12 <sup>a</sup>  | 3.67 <sup>b</sup>  | 4.89 <sup>ab</sup> | 0.15 | 0.039 |
| MDA, nmol/mg prot                            | 1.31 <sup>c</sup>  | 2.16 <sup>a</sup>  | 1.64 <sup>b</sup>  | 0.09 | 0.007 |
| <b>Liver LPS and cytokine concentrations</b> |                    |                    |                    |      |       |
| LPS, ng/mg prot                              | 2.98 <sup>c</sup>  | 6.02 <sup>a</sup>  | 4.28 <sup>b</sup>  | 0.11 | 0.005 |
| TNF- $\alpha$ , ng/mg prot                   | 8.09 <sup>c</sup>  | 13.48 <sup>a</sup> | 10.29 <sup>b</sup> | 0.86 | 0.019 |
| IL-1 $\beta$ , ng/mg prot                    | 11.28              | 11.98              | 11.69              | 0.79 | 0.097 |
| IL-6, ng/mg prot                             | 13.26 <sup>c</sup> | 21.89 <sup>a</sup> | 16.97 <sup>b</sup> | 1.04 | 0.008 |

<sup>a</sup> Mean value with their standard errors of the mean (SEM) (n = 12 per group). Within a row, mean values without a common letter differ ( $P < 0.05$ ).

<sup>b</sup> CON, mice in the control group fed a standard lab diet; Cd group, mice were challenged with CdCl<sub>2</sub> once a day by gavage; Mel+Cd group, the CdCl<sub>2</sub> mice were treated with melatonin; TG, triglyceride; HDL, high-density lipoprotein; LDL, low-density lipoprotein; TCHO, total cholesterol; CPT1, carnitine palmitoyl transferase 1; GSH-Px, glutathione peroxidase; SOD, superoxide dismutase; T-AOC, total antioxidant capacity; MDA, malondialdehyde; LPS, lipopolysaccharide; TNF- $\alpha$ , tumor necrosis factor  $\alpha$ ; IL, interleukin; ALB, albumin; ALP, alkaline phosphatase; HOMA-IR, homeostasis model assessment-insulin resistance; HOMA-IR is calculated as serum glucose (mM)  $\times$  serum insulin ( $\mu$ U/mL)/22.5; liver index is calculated as liver weight/bodyweight (week 10)  $\times$  100%.

Table S4 Effects of gut microbiota transplantation from donor mice fed CON, Cd, and Mel +Cd on the growth performance, serum lipid metabolism indices, antioxidative capacity, LPS and cytokine concentrations in the liver in antibiotics-treated mice for 10 weeks <sup>a</sup>.

| Item <sup>b</sup>                   | GMT (CON)          | GMT (Cd)           | GMT (Mel+Cd)        | SEM  | P value |
|-------------------------------------|--------------------|--------------------|---------------------|------|---------|
| <b>Growth performance</b>           |                    |                    |                     |      |         |
| Initial weight, g                   | 21.30              | 21.34              | 21.32               | 0.79 | 0.218   |
| Final weight, g                     | 27.62 <sup>a</sup> | 23.23 <sup>b</sup> | 25.39 <sup>ab</sup> | 1.56 | 0.036   |
| Body weight gain, g                 | 6.32 <sup>a</sup>  | 1.89 <sup>c</sup>  | 4.07 <sup>b</sup>   | 0.24 | 0.011   |
| Liver weight, g                     | 0.84 <sup>c</sup>  | 1.23 <sup>a</sup>  | 1.06 <sup>b</sup>   | 0.06 | 0.022   |
| Liver index, %                      | 3.01 <sup>c</sup>  | 5.29 <sup>a</sup>  | 4.18 <sup>b</sup>   | 0.33 | 0.009   |
| <b>Serum enzyme activities</b>      |                    |                    |                     |      |         |
| <b>and Lipid metabolism indices</b> |                    |                    |                     |      |         |
| Serum ALB, g/L                      | 40.23 <sup>a</sup> | 24.16 <sup>c</sup> | 32.57 <sup>b</sup>  | 3.04 | 0.008   |
| Serum ALP, U/L                      | 42.34 <sup>c</sup> | 89.43 <sup>a</sup> | 60.16 <sup>b</sup>  | 2.98 | 0.011   |
| Serum TG, mM                        | 0.52 <sup>c</sup>  | 1.12 <sup>a</sup>  | 0.79 <sup>b</sup>   | 0.06 | 0.015   |
| Serum TCHO, mM                      | 2.63               | 5.14 <sup>a</sup>  | 3.89 <sup>b</sup>   | 0.47 | 0.009   |
| Serum HDL, mM                       | 2.09               | 2.12               | 2.11                | 0.31 | 0.108   |
| Serum LDL, mM                       | 0.72 <sup>c</sup>  | 1.28 <sup>a</sup>  | 0.93 <sup>b</sup>   | 0.05 | 0.017   |
| Serum glucose, mM                   | 2.99 <sup>c</sup>  | 6.12 <sup>a</sup>  | 4.19 <sup>b</sup>   | 0.29 | 0.024   |
| Serum insulin, μU/mL                | 7.85 <sup>c</sup>  | 13.94 <sup>a</sup> | 10.15 <sup>b</sup>  | 1.59 | 0.016   |
| HOMA-IR                             | 1.04 <sup>c</sup>  | 3.79 <sup>a</sup>  | 1.89 <sup>b</sup>   | 0.23 | 0.008   |
| Liver CPT1 activity, μmol/min/mg    | 4.99 <sup>a</sup>  | 2.19 <sup>c</sup>  | 3.21 <sup>b</sup>   | 0.31 | 0.018   |
| Liver TG, μmol/g                    | 5.87 <sup>c</sup>  | 10.13 <sup>a</sup> | 7.75 <sup>b</sup>   | 0.38 | 0.008   |
| <b>Antioxidative capacity</b>       |                    |                    |                     |      |         |

|                                              |                    |                    |                    |       |       |
|----------------------------------------------|--------------------|--------------------|--------------------|-------|-------|
| GSH-Px, U/mg prot                            | 35.58 <sup>a</sup> | 19.86 <sup>c</sup> | 27.54 <sup>b</sup> | 1.36  | 0.013 |
| SOD, U/mg prot                               | 47.48 <sup>a</sup> | 29.79 <sup>c</sup> | 36.74 <sup>b</sup> | 1.68  | 0.009 |
| T-AOC, U/mg prot                             | 4.53 <sup>a</sup>  | 2.28 <sup>c</sup>  | 3.36 <sup>b</sup>  | 0.10  | 0.015 |
| MDA, nmol/mg prot                            | 1.26 <sup>c</sup>  | 1.99 <sup>a</sup>  | 1.58 <sup>b</sup>  | 0.07  | 0.005 |
| <b>Liver LPS and cytokine concentrations</b> |                    |                    |                    |       |       |
| LPS, ng/mg prot                              | 2.03 <sup>c</sup>  | 5.11 <sup>a</sup>  | 3.16 <sup>b</sup>  | 0.14  | 0.012 |
| TNF- $\alpha$ , ng/mg prot                   | 6.16 <sup>c</sup>  | 11.24 <sup>a</sup> | 8.15 <sup>b</sup>  | 0.79  | 0.007 |
| IL-1 $\beta$ , ng/mg prot                    | 9.16               | 9.21               | 9.15               | 0.644 | 0.142 |
| IL-6, ng/mg prot                             | 10.14 <sup>c</sup> | 18.75 <sup>a</sup> | 14.26 <sup>b</sup> | 1.12  | 0.015 |

<sup>a</sup> Mean value with their standard errors of the mean (SEM) (n = 12 per group). Within a row, mean values without a common letter differ ( $P < 0.05$ ).

<sup>b</sup> GMT, gut microbiota transplantation; GMT(CON), the microbiota-depleted mice that were originally fed control diet received microbiota transplantations from donor mice fed control diet; GMT(Cd), the microbiota-depleted mice that were originally fed control diet received microbiota transplantations from donor mice treated CdCl<sub>2</sub>; GMT (Mel+Cd), the microbiota-depleted mice that were originally fed control diet received microbiota transplantations from donor mice in Mel + Cd groups; TG, triglyceride; HDL, high-density lipoprotein; LDL, low-density lipoprotein; TCHO, total cholesterol; CPT1, carnitine palmitoyl transferase 1; GSH-Px, glutathione peroxidase; SOD, superoxide dismutase; T-AOC, total antioxidant capacity; MDA, malondialdehyde; LPS, lipopolysaccharide; TNF- $\alpha$ , tumor necrosis factor  $\alpha$ ; IL, interleukin; ALB, albumin; ALP, alkaline phosphatase; HOMA-IR, homeostasis model assessment-insulin resistance; HOMA-IR is calculated as serum glucose (mM)  $\times$  serum insulin ( $\mu$ U/mL)/22.5; liver index is calculated as liver weight/bodyweight (week 10)  $\times$  100%.

Table S5 Effects of melatonin and Cdcl<sub>2</sub> oral gavage on the growth performance, serum lipid metabolism indices, antioxidative capacity, LPS and cytokine concentrations in the liver in antibiotics-treated mice for 10 weeks <sup>a</sup>.

| Item <sup>b</sup>                                           | Anti (CON) | Anti (Cd) | Anti (Mel+Cd) | SEM  | P value |
|-------------------------------------------------------------|------------|-----------|---------------|------|---------|
| <b>Growth performance</b>                                   |            |           |               |      |         |
| Initial weight, g                                           | 21.76      | 21.80     | 21.81         | 0.92 | 0.208   |
| Final weight, g                                             | 23.22      | 23.25     | 23.23         | 1.27 | 0.104   |
| Body weight gain, g                                         | 1.46       | 1.45      | 1.42          | 0.31 | 0.086   |
| Liver weight, g                                             | 0.81       | 0.80      | 0.78          | 0.08 | 0.212   |
| Liver index, %                                              | 3.49       | 3.44      | 3.36          | 0.29 | 0.152   |
| <b>Serum enzyme activities and Lipid metabolism indices</b> |            |           |               |      |         |
| Serum ALB, g/L                                              | 34.13      | 32.57     | 33.97         | 2.16 | 0.219   |
| Serum ALP, U/L                                              | 38.45      | 41.42     | 39.53         | 1.96 | 0.117   |
| Serum TG, mM                                                | 0.55       | 0.58      | 0.56          | 0.06 | 0.095   |
| Serum TCHO, mM                                              | 2.37       | 2.39      | 2.32          | 0.29 | 0.205   |
| Serum HDL, mM                                               | 1.98       | 2.01      | 1.96          | 0.29 | 0.103   |
| Serum LDL, mM                                               | 0.76       | 0.80      | 0.78          | 0.09 | 0.116   |
| Serum glucose, mM                                           | 3.01       | 2.98      | 3.04          | 0.31 | 0.214   |
| Serum insulin, μU/mL                                        | 7.54       | 7.58      | 7.49          | 1.23 | 0.092   |
| HOMA-IR                                                     | 1.01       | 0.99      | 1.01          | 0.16 | 0.213   |
| Liver CPT1 activity, μmol/min/mg                            | 5.02       | 4.91      | 4.99          | 0.31 | 0.099   |
| Liver TG, μmol/g                                            | 5.53       | 5.57      | 5.55          | 0.36 | 0.138   |
| <b>Antioxidative capacity</b>                               |            |           |               |      |         |
| GSH-Px, U/mg prot                                           | 31.34      | 32.08     | 31.96         | 1.28 | 0.106   |

|                                              |       |       |       |      |       |
|----------------------------------------------|-------|-------|-------|------|-------|
| SOD, U/mg prot                               | 42.67 | 42.09 | 42.38 | 1.63 | 0.207 |
| T-AOC, U/mg prot                             | 4.19  | 4.14  | 4.18  | 0.11 | 0.181 |
| MDA, nmol/mg prot                            | 1.12  | 1.18  | 1.14  | 0.07 | 0.163 |
| <b>Liver LPS and cytokine concentrations</b> |       |       |       |      |       |
| LPS, ng/mg prot                              | 1.95  | 2.01  | 1.94  | 0.16 | 0.092 |
| TNF- $\alpha$ , ng/mg prot                   | 5.32  | 5.40  | 5.37  | 0.78 | 0.194 |
| IL-1 $\beta$ , ng/mg prot                    | 9.34  | 9.43  | 9.41  | 0.58 | 0.115 |
| IL-6, ng/mg prot                             | 9.79  | 9.86  | 9.83  | 1.22 | 0.224 |

<sup>a</sup> Mean value with their standard errors of the mean (SEM) (n = 12 per group). Within a row, mean values without a common letter differ ( $P < 0.05$ ).

<sup>b</sup> Anti, antibiotics; Anti (CON), the microbiota-depleted mice that were originally fed control diet; Anti (Cd), the microbiota-depleted mice that were originally fed control diet treated CdCl<sub>2</sub>; Anti (Mel+Cd), the microbiota-depleted mice that were originally fed control diet treated melatonin and CdCl<sub>2</sub>; TG, triglyceride; HDL, high-density lipoprotein; LDL, low-density lipoprotein; TCHO, total cholesterol; CPT1, carnitine palmitoyl transferase 1; GSH-Px, glutathione peroxidase; SOD, superoxide dismutase; T-AOC, total antioxidant capacity; MDA, malondialdehyde; LPS, lipopolysaccharide; TNF- $\alpha$ , tumor necrosis factor  $\alpha$ ; IL, interleukin; ALB, albumin; ALP, alkaline phosphatase; HOMA-IR, homeostasis model assessment-insulin resistance; HOMA-IR is calculated as serum glucose (mM)  $\times$  serum insulin ( $\mu$ U/mL)/22.5; liver index is calculated as liver weight/bodyweight (week 10)  $\times$  100%.

Table S6 Effects of melatonin supplementation on mitochondrial ROS production,  $\Delta\Psi_m$ , mitochondrial complex activity, apoptosis levels, NAD<sup>+</sup>/NADH ratio and ATP content in the liver in CdCl<sub>2</sub> treated mice for 10 weeks<sup>a</sup>.

| Item <sup>b</sup>                | CON                 | Cd                  | Mel+Cd               | SEM  | P value |
|----------------------------------|---------------------|---------------------|----------------------|------|---------|
| ROS production, fold change      | 1.00 <sup>c</sup>   | 3.04 <sup>a</sup>   | 1.87 <sup>b</sup>    | 0.12 | 0.009   |
| $\Delta\Psi_m$ , fold change     | 1.00 <sup>a</sup>   | 0.53 <sup>c</sup>   | 0.77 <sup>b</sup>    | 0.09 | 0.012   |
| Apoptotic cells, %               | 3.16 <sup>c</sup>   | 9.86 <sup>a</sup>   | 5.63 <sup>b</sup>    | 0.19 | 0.021   |
| Necrotic cells, %                | 0.45 <sup>c</sup>   | 0.89 <sup>a</sup>   | 0.68 <sup>b</sup>    | 0.07 | 0.010   |
| NAD <sup>+</sup> /NADH           | 4.47 <sup>a</sup>   | 2.09 <sup>c</sup>   | 3.31 <sup>b</sup>    | 0.18 | 0.009   |
| ATP content, fold change         | 1.00 <sup>a</sup>   | 0.48 <sup>c</sup>   | 0.69 <sup>b</sup>    | 0.09 | 0.007   |
| Complex I, nmol/min/mg protein   | 209.37 <sup>a</sup> | 137.81 <sup>c</sup> | 165.55 <sup>b</sup>  | 5.97 | 0.024   |
| Complex II, nmol/min/mg protein  | 278.11 <sup>a</sup> | 231.12 <sup>b</sup> | 251.83 <sup>ab</sup> | 6.11 | 0.019   |
| Complex III, nmol/min/mg protein | 378.19 <sup>a</sup> | 295.58 <sup>c</sup> | 339.73 <sup>b</sup>  | 7.10 | 0.021   |
| Complex IV, nmol/min/mg protein  | 254.29 <sup>a</sup> | 178.19 <sup>c</sup> | 209.29 <sup>b</sup>  | 4.99 | 0.009   |

<sup>a</sup> Mean value with their standard errors of the mean (SEM) (n = 12 per group). Within a row, mean values without a common letter differ ( $P < 0.05$ ).

<sup>b</sup> CON, mice in the control group fed a standard lab diet; Cd group, mice were challenged with CdCl<sub>2</sub> once a day by gavage; Mel+Cd group, the CdCl<sub>2</sub> mice were treated with melatonin; ROS, reactive oxygen species; ATP, adenosine triphosphate;  $\Delta\Psi_m$ , mitochondrial membrane potential change; NAD, Nicotinamide adenine dinucleotide.

Table S7 Effects of gut microbiota transplantation from donor mice fed CON, Cd, and Mel +Cd on the mitochondrial ROS production,  $\Delta\Psi_m$ , mitochondrial complex activity, apoptosis levels, NAD<sup>+</sup>/NADH ratio and ATP content in the liver in antibiotics-treated mice for 10 weeks <sup>a</sup>.

| Item <sup>b</sup>                | GMT (CON)           | GMT(Cd)             | GMT (Mel+Cd)         | SEM  | P value |
|----------------------------------|---------------------|---------------------|----------------------|------|---------|
| ROS production, fold change      | 1.00 <sup>c</sup>   | 2.54 <sup>a</sup>   | 1.42 <sup>b</sup>    | 0.09 | 0.009   |
| $\Delta\Psi_m$ , fold change     | 1.00 <sup>a</sup>   | 0.64 <sup>c</sup>   | 0.81 <sup>b</sup>    | 0.07 | 0.018   |
| Apoptotic cells, %               | 3.01 <sup>c</sup>   | 7.36 <sup>a</sup>   | 4.85 <sup>b</sup>    | 0.13 | 0.011   |
| Necrotic cells, %                | 0.37 <sup>c</sup>   | 0.77 <sup>a</sup>   | 0.56 <sup>b</sup>    | 0.06 | 0.006   |
| NAD <sup>+</sup> /NADH           | 4.06 <sup>a</sup>   | 1.57 <sup>c</sup>   | 2.96 <sup>b</sup>    | 0.12 | 0.007   |
| ATP content, fold change         | 1.00 <sup>a</sup>   | 0.52 <sup>c</sup>   | 0.75 <sup>b</sup>    | 0.07 | 0.009   |
| Complex I, nmol/min/mg protein   | 192.48 <sup>a</sup> | 124.25 <sup>c</sup> | 156.12 <sup>b</sup>  | 3.97 | 0.011   |
| Complex II, nmol/min/mg protein  | 256.48 <sup>a</sup> | 207.89 <sup>c</sup> | 231.32 <sup>b</sup>  | 5.09 | 0.028   |
| Complex III, nmol/min/mg protein | 346.22 <sup>a</sup> | 314.89 <sup>b</sup> | 330.12 <sup>ab</sup> | 6.38 | 0.006   |
| Complex IV, nmol/min/mg protein  | 268.12 <sup>a</sup> | 201.52 <sup>c</sup> | 228.12 <sup>b</sup>  | 5.01 | 0.007   |

<sup>a</sup> Mean value with their standard errors of the mean (SEM) (n = 12 per group). Within a row, mean values without a common letter differ ( $P < 0.05$ ).

<sup>b</sup> GMT, gut microbiota transplantation; GMT(CON), the microbiota-depleted mice that were originally fed control diet received microbiota transplantations from donor mice fed control diet; GMT(Cd), the microbiota-depleted mice that were originally fed control diet received microbiota transplantations from donor mice treated CdCl<sub>2</sub>; GMT (Mel+Cd), the microbiota-depleted mice that were originally fed control diet received microbiota transplantations from donor mice in Mel + Cd groups; ROS, reactive oxygen species; ATP, adenosine triphosphate;  $\Delta\Psi_m$ , mitochondrial membrane potential change; NAD, Nicotinamide adenine dinucleotide.

Table S8 Effects of melatonin and CdCl<sub>2</sub> oral gavage on mitochondrial ROS production,  $\Delta\Psi_m$ , mitochondrial complex activity, apoptosis levels, NAD<sup>+</sup>/NADH ratio and ATP content in the liver in antibiotics-treated mice for 10 weeks <sup>a</sup>.

| Item <sup>b</sup>                | Anti (CON) | Anti (Cd) | Anti (Mel+Cd) | SEM  | P value |
|----------------------------------|------------|-----------|---------------|------|---------|
| ROS production, fold change      | 1.00       | 1.06      | 0.98          | 0.10 | 0.163   |
| $\Delta\Psi_m$ , fold change     | 1.00       | 0.96      | 1.04          | 0.11 | 0.142   |
| Apoptotic cells, %               | 2.98       | 3.05      | 3.01          | 0.10 | 0.209   |
| Necrotic cells, %                | 0.32       | 0.39      | 0.36          | 0.08 | 0.115   |
| NAD <sup>+</sup> /NADH           | 3.89       | 3.94      | 3.91          | 0.14 | 0.104   |
| ATP content, fold change         | 1.00       | 0.89      | 0.94          | 0.06 | 0.099   |
| Complex I, nmol/min/mg protein   | 189.25     | 190.13    | 185.68        | 5.11 | 0.216   |
| Complex II, nmol/min/mg protein  | 239.47     | 241.58    | 237.69        | 4.99 | 0.117   |
| Complex III, nmol/min/mg protein | 357.38     | 349.12    | 353.17        | 5.93 | 0.089   |
| Complex IV, nmol/min/mg protein  | 235.19     | 240.21    | 237.64        | 5.06 | 0.182   |

<sup>a</sup> Mean value with their standard errors of the mean (SEM) (n = 12 per group). Within a row, mean values without a common letter differ ( $P < 0.05$ ).

<sup>b</sup> Anti, antibiotics; Anti (CON), the microbiota-depleted mice that were originally fed control diet; Anti (Cd), the microbiota-depleted mice that were originally fed control diet treated CdCl<sub>2</sub>; Anti (Mel+Cd), the microbiota-depleted mice that were originally fed control diet treated melatonin and CdCl<sub>2</sub>; ROS, reactive oxygen species; ATP, adenosine triphosphate;  $\Delta\Psi_m$ , mitochondrial membrane potential change; NAD, Nicotinamide adenine dinucleotide.

Table S9 Effect of melatonin supplementation on the Cd residues in liver and ileum and melatonin level in the serum in CdCl<sub>2</sub> treated mice for 10 weeks<sup>a</sup>.

| Item <sup>b</sup>            | CON                | Cd                 | Mel+Cd             | SEM  | P value |
|------------------------------|--------------------|--------------------|--------------------|------|---------|
| Melatonin, pg/mL             | 22.34 <sup>a</sup> | 12.10 <sup>c</sup> | 17.86 <sup>b</sup> | 1.59 | 0.007   |
| Cd residues, µg/g wet weight |                    |                    |                    |      |         |
| Liver                        | 0.047 <sup>c</sup> | 4.02 <sup>a</sup>  | 2.61 <sup>b</sup>  | 0.12 | 0.014   |
| Ileum                        | 0.029 <sup>c</sup> | 2.56 <sup>a</sup>  | 1.32 <sup>b</sup>  | 0.09 | 0.008   |

<sup>a</sup> Mean value with their standard errors of the mean (SEM) (n = 12 per group). Within a row, mean values without a common letter differ ( $P < 0.05$ ).

<sup>b</sup> Cd, cadmium; CON, mice in the control group fed a standard lab diet; Cd group, mice were challenged with CdCl<sub>2</sub> once a day by gavage; Mel+Cd group, the CdCl<sub>2</sub> mice were treated with melatonin.

Table S10 Effects of gut microbiota transplantation from donor mice fed CON, Cd, and Mel +Cd on the Cd residues in liver and ileum and melatonin level in the serum in antibiotics-treated mice for 10 weeks <sup>a</sup>.

| Item <sup>b</sup>            | GMT (CON)          | GMT (Cd)           | GMT (Mel+Cd)       | SEM  | P value |
|------------------------------|--------------------|--------------------|--------------------|------|---------|
| Melatonin, pg/mL             | 19.15 <sup>a</sup> | 10.67 <sup>c</sup> | 14.68 <sup>b</sup> | 1.49 | 0.017   |
| Cd residues, µg/g wet weight |                    |                    |                    |      |         |
| Liver                        | 0.034 <sup>c</sup> | 3.24 <sup>a</sup>  | 1.98 <sup>b</sup>  | 0.08 | 0.009   |
| Ileum                        | 0.017 <sup>c</sup> | 1.99 <sup>a</sup>  | 1.01 <sup>b</sup>  | 0.11 | 0.019   |

<sup>a</sup> Mean value with their standard errors of the mean (SEM) (n = 12 per group). Within a row, mean values without a common letter differ ( $P < 0.05$ ).

<sup>b</sup> Cd, cadmium; GMT, gut microbiota transplantation; GMT(CON), the microbiota-depleted mice that were originally fed control diet received microbiota transplantations from donor mice fed control diet; GMT(Cd), the microbiota-depleted mice that were originally fed control diet received microbiota transplantations from donor mice treated CdCl<sub>2</sub>; GMT (Mel+Cd), the microbiota-depleted mice that were originally fed control diet received microbiota transplantations from donor mice in Mel + Cd groups.

Table S11 Effects of melatonin and CdCl<sub>2</sub> oral gavage on the Cd residues in liver and ileum and melatonin level in the serum in antibiotics-treated mice for 10 weeks <sup>a</sup>.

| Item <sup>b</sup>               | Anti (CON)         | Anti (Cd)          | Anti (Mel+Cd)      | SEM  | P value |
|---------------------------------|--------------------|--------------------|--------------------|------|---------|
| Melatonin, pg/mL                | 12.05 <sup>b</sup> | 11.96 <sup>b</sup> | 18.19 <sup>a</sup> | 1.37 | 0.012   |
| Cd residues,<br>µg/g wet weight |                    |                    |                    |      |         |
| Liver                           | 0.029 <sup>b</sup> | 3.37 <sup>a</sup>  | 2.32 <sup>a</sup>  | 0.06 | 0.014   |
| Ileum                           | 0.014 <sup>b</sup> | 2.16 <sup>a</sup>  | 2.14 <sup>a</sup>  | 0.05 | 0.026   |

<sup>a</sup> Mean value with their standard errors of the mean (SEM) (n = 12 per group). Within a row, mean values without a common letter differ ( $P < 0.05$ ).

<sup>b</sup> Cd, cadmium; Anti, antibiotics; Anti (CON), the microbiota-depleted mice that were originally fed control diet; Anti (Cd), the microbiota-depleted mice that were originally fed control diet treated CdCl<sub>2</sub>; Anti (Mel+Cd), the microbiota-depleted mice that were originally fed control diet treated melatonin and CdCl<sub>2</sub>.

Table S12 Effect of melatonin supplementation on the villus morphology, barrier function, anti-oxidative capacity, LPS and cytokine concentrations in the ileum, and DAO activity and D-lactic acid concentration in the serum in CdCl<sub>2</sub> treated mice for 10 weeks<sup>a</sup>.

| Item <sup>b</sup>                                                | CON                 | Cd                  | Mel+Cd              | SEM  | P value |
|------------------------------------------------------------------|---------------------|---------------------|---------------------|------|---------|
| <b>Ileal villus morphology</b>                                   |                     |                     |                     |      |         |
| Villous height, $\mu\text{m}$                                    | 289.14 <sup>a</sup> | 197.17 <sup>c</sup> | 235.34 <sup>b</sup> | 8.99 | 0.007   |
| Crypt depth, $\mu\text{m}$                                       | 110.75 <sup>c</sup> | 159.61 <sup>a</sup> | 132.96 <sup>b</sup> | 4.11 | 0.021   |
| VCR                                                              | 2.61 <sup>a</sup>   | 1.24 <sup>c</sup>   | 1.77 <sup>b</sup>   | 0.23 | 0.009   |
| <b>Ileal barrier function</b>                                    |                     |                     |                     |      |         |
| TER, $\Omega \cdot \text{cm}^2$                                  | 66.89 <sup>a</sup>  | 41.88 <sup>c</sup>  | 52.14 <sup>b</sup>  | 3.27 | 0.011   |
| FD4 flux, $\mu\text{g} \cdot \text{cm}^{-2} \cdot \text{h}^{-1}$ | 2.01 <sup>c</sup>   | 3.68 <sup>a</sup>   | 2.71 <sup>b</sup>   | 0.17 | 0.009   |
| <b>Ileal anti-oxidative capacity</b>                             |                     |                     |                     |      |         |
| GSH-Px, U/mg prot                                                | 35.89 <sup>a</sup>  | 16.99 <sup>c</sup>  | 25.86 <sup>b</sup>  | 1.58 | 0.015   |
| SOD, U/mg prot                                                   | 49.89 <sup>a</sup>  | 27.48 <sup>c</sup>  | 36.53 <sup>b</sup>  | 1.97 | 0.008   |
| T-AOC, U/mg prot                                                 | 6.08 <sup>a</sup>   | 3.05 <sup>c</sup>   | 4.96 <sup>b</sup>   | 0.11 | 0.021   |
| MDA, nmol/mg prot                                                | 1.12 <sup>c</sup>   | 1.98 <sup>a</sup>   | 1.49 <sup>b</sup>   | 0.06 | 0.013   |
| <b>Ileal LPS and cytokine concentrations</b>                     |                     |                     |                     |      |         |
| LPS, ng/mg prot                                                  | 3.01 <sup>c</sup>   | 5.99 <sup>a</sup>   | 4.11 <sup>b</sup>   | 0.09 | 0.007   |
| TNF- $\alpha$ , ng/mg prot                                       | 7.11 <sup>c</sup>   | 12.29 <sup>a</sup>  | 9.03 <sup>b</sup>   | 0.69 | 0.013   |
| IL-1 $\beta$ , ng/mg prot                                        | 9.38 <sup>b</sup>   | 13.12 <sup>a</sup>  | 11.07 <sup>ab</sup> | 0.66 | 0.028   |
| IL-6, ng/mg prot                                                 | 11.98 <sup>c</sup>  | 18.75 <sup>a</sup>  | 15.18 <sup>b</sup>  | 0.95 | 0.019   |
| <b>Serum</b>                                                     |                     |                     |                     |      |         |
| DAO, U mL <sup>-1</sup>                                          | 1.15 <sup>c</sup>   | 1.95 <sup>a</sup>   | 1.61 <sup>b</sup>   | 0.06 | 0.014   |

|                                   |                   |                   |                   |      |       |
|-----------------------------------|-------------------|-------------------|-------------------|------|-------|
| D-lactic acid, mg L <sup>-1</sup> | 0.84 <sup>c</sup> | 1.59 <sup>a</sup> | 1.15 <sup>b</sup> | 0.08 | 0.007 |
|-----------------------------------|-------------------|-------------------|-------------------|------|-------|

<sup>a</sup> Mean value with their standard errors of the mean (SEM) (n = 12 per group). Within a row, mean values without a common letter differ ( $P < 0.05$ ).

<sup>b</sup> CON, mice in the control group fed a standard lab diet; Cd group, mice were challenged with CdCl<sub>2</sub> once a day by gavage; Mel+Cd group, the CdCl<sub>2</sub> mice were treated with melatonin; VCR, villous height/crypt depth ratio; DAO, diamine oxidase; TER, transepithelial electrical resistance; FD4, fluorescein isothiocyanate dextran (4 kDa); TNF- $\alpha$ , tumor necrosis factor  $\alpha$ ; IL, interleukin; LPS, lipopolysaccharide; T-AOC, total antioxidant capacity; MDA, malondialdehyde; SOD, superoxide dismutase; GSH-Px, glutathione peroxidase.

Table S13 Effects of gut microbiota transplantation from donor mice fed CON, Cd, and Mel +Cd on the villus morphology, barrier function, anti-oxidative capacity, LPS and cytokine concentrations in the ileum, and DAO activity and D-lactic acid concentration in the serum in antibiotics-treated mice for 10 weeks <sup>a</sup>.

| Item <sup>b</sup>                                            | GMT (CON)           | GMT (Cd)            | GMT (Mel+Cd)        | SEM  | P value |
|--------------------------------------------------------------|---------------------|---------------------|---------------------|------|---------|
| <b>Ileal villus morphology</b>                               |                     |                     |                     |      |         |
| Villous height, $\mu\text{m}$                                | 263.98 <sup>a</sup> | 163.56 <sup>c</sup> | 205.84 <sup>b</sup> | 6.49 | 0.016   |
| Crypt depth, $\mu\text{m}$                                   | 100.12 <sup>c</sup> | 143.42 <sup>a</sup> | 119.99 <sup>b</sup> | 5.34 | 0.009   |
| VCR                                                          | 2.64 <sup>a</sup>   | 1.14 <sup>c</sup>   | 1.72 <sup>b</sup>   | 0.15 | 0.014   |
| <b>Ileal barrier function</b>                                |                     |                     |                     |      |         |
| TER, $\Omega\cdot\text{cm}^2$                                | 53.37 <sup>a</sup>  | 32.47 <sup>c</sup>  | 41.65 <sup>b</sup>  | 4.68 | 0.007   |
| FD4 flux, $\mu\text{g}\cdot\text{cm}^{-2}\cdot\text{h}^{-1}$ | 1.78 <sup>c</sup>   | 3.04 <sup>a</sup>   | 2.24 <sup>b</sup>   | 0.12 | 0.015   |
| <b>Ileal anti-oxidative capacity</b>                         |                     |                     |                     |      |         |
| GSH-Px, U/mg prot                                            | 30.26 <sup>a</sup>  | 12.59 <sup>c</sup>  | 19.47 <sup>b</sup>  | 1.28 | 0.006   |
| SOD, U/mg prot                                               | 41.12 <sup>a</sup>  | 19.95 <sup>c</sup>  | 30.17 <sup>b</sup>  | 1.65 | 0.009   |
| T-AOC, U/mg prot                                             | 5.24 <sup>a</sup>   | 3.15 <sup>c</sup>   | 4.28 <sup>b</sup>   | 0.17 | 0.008   |
| MDA, nmol/mg prot                                            | 1.02 <sup>c</sup>   | 1.75 <sup>a</sup>   | 1.34 <sup>b</sup>   | 0.09 | 0.021   |
| <b>Ileal LPS and cytokine concentrations</b>                 |                     |                     |                     |      |         |
| LPS, ng/mg prot                                              | 2.47 <sup>c</sup>   | 5.11 <sup>a</sup>   | 3.76 <sup>b</sup>   | 0.11 | 0.009   |
| TNF- $\alpha$ , ng/mg prot                                   | 6.25 <sup>c</sup>   | 10.17 <sup>a</sup>  | 8.09 <sup>b</sup>   | 0.58 | 0.018   |
| IL-1 $\beta$ , ng/mg prot                                    | 7.89 <sup>c</sup>   | 13.94 <sup>a</sup>  | 10.11 <sup>b</sup>  | 0.71 | 0.015   |
| IL-6, ng/mg prot                                             | 9.47 <sup>c</sup>   | 17.89 <sup>a</sup>  | 12.79 <sup>b</sup>  | 0.48 | 0.008   |
| <b>Serum</b>                                                 |                     |                     |                     |      |         |
| DAO, U mL <sup>-1</sup>                                      | 1.07 <sup>c</sup>   | 1.67 <sup>a</sup>   | 1.40 <sup>b</sup>   | 0.09 | 0.007   |

|                                   |                   |                   |                   |      |       |
|-----------------------------------|-------------------|-------------------|-------------------|------|-------|
| D-lactic acid, mg L <sup>-1</sup> | 0.67 <sup>c</sup> | 1.31 <sup>a</sup> | 1.01 <sup>b</sup> | 0.06 | 0.011 |
|-----------------------------------|-------------------|-------------------|-------------------|------|-------|

<sup>a</sup> Mean value with their standard errors of the mean (SEM) (n = 12 per group). Within a row, mean values without a common letter differ ( $P < 0.05$ ).

<sup>b</sup> GMT, gut microbiota transplantation; GMT(CON), the microbiota-depleted mice that were originally fed control diet received microbiota transplantations from donor mice fed control diet; GMT(Cd), the microbiota-depleted mice that were originally fed control diet received microbiota transplantations from donor mice treated CdCl<sub>2</sub>; GMT (Mel+Cd), the microbiota-depleted mice that were originally fed control diet received microbiota transplantations from donor mice in Mel + Cd groups; VCR, villous height/crypt depth ratio; DAO, diamine oxidase; TER, transepithelial electrical resistance; FD4, fluorescein isothiocyanate dextran (4 kDa); TNF- $\alpha$ , tumor necrosis factor  $\alpha$ ; IL, interleukin; LPS, lipopolysaccharide; T-AOC, total antioxidant capacity; MDA, malondialdehyde; SOD, superoxide dismutase; GSH-Px, glutathione peroxidase.

Table S14 Effects of melatonin and CdCl<sub>2</sub> oral gavage on the villus morphology, barrier function, anti-oxidative capacity, LPS and cytokine concentrations in the ileum, and DAO activity and D-lactic acid concentration in the serum in antibiotics-treated mice for 10 weeks <sup>a</sup>.

| Item <sup>b</sup>                                                | Anti (CON) | Anti (Cd) | Anti (Mel+Cd) | SEM  | P value |
|------------------------------------------------------------------|------------|-----------|---------------|------|---------|
| <b>Ileal villus morphology</b>                                   |            |           |               |      |         |
| Villous height, $\mu\text{m}$                                    | 252.88     | 247.36    | 251.76        | 7.43 | 0.116   |
| Crypt depth, $\mu\text{m}$                                       | 94.74      | 99.16     | 92.26         | 3.74 | 0.207   |
| VCR                                                              | 2.67       | 2.50      | 2.73          | 0.31 | 0.109   |
| <b>Ileal barrier function</b>                                    |            |           |               |      |         |
| TER, $\Omega \cdot \text{cm}^2$                                  | 51.43      | 49.94     | 50.69         | 4.11 | 0.104   |
| FD4 flux, $\mu\text{g} \cdot \text{cm}^{-2} \cdot \text{h}^{-1}$ | 1.89       | 1.91      | 1.86          | 0.13 | 0.192   |
| <b>Ileal anti-oxidative capacity</b>                             |            |           |               |      |         |
| GSH-Px, U/mg prot                                                | 26.45      | 25.69     | 26.08         | 1.85 | 0.118   |
| SOD, U/mg prot                                                   | 38.11      | 37.96     | 38.03         | 1.47 | 0.241   |
| T-AOC, U/mg prot                                                 | 5.01       | 4.95      | 4.99          | 0.13 | 0.112   |
| MDA, nmol/mg prot                                                | 1.25       | 1.19      | 1.22          | 0.05 | 0.097   |
| <b>Ileal LPS and cytokine concentrations</b>                     |            |           |               |      |         |
| LPS, ng/mg prot                                                  | 2.21       | 2.19      | 2.17          | 0.05 | 0.105   |
| TNF- $\alpha$ , ng/mg prot                                       | 5.18       | 5.23      | 5.19          | 0.36 | 0.089   |
| IL-1 $\beta$ , ng/mg prot                                        | 7.14       | 7.19      | 7.12          | 0.47 | 0.129   |
| IL-6, ng/mg prot                                                 | 9.13       | 9.18      | 9.14          | 0.68 | 0.117   |
| <b>Serum</b>                                                     |            |           |               |      |         |
| DAO, U mL <sup>-1</sup>                                          | 0.95       | 1.01      | 0.99          | 0.07 | 0.223   |

|                                   |      |      |      |      |       |
|-----------------------------------|------|------|------|------|-------|
| D-lactic acid, mg L <sup>-1</sup> | 0.77 | 0.80 | 0.81 | 0.09 | 0.096 |
|-----------------------------------|------|------|------|------|-------|

<sup>a</sup> Mean value with their standard errors of the mean (SEM) (n = 12 per group). Within a row, mean values without a common letter differ ( $P < 0.05$ ).

<sup>b</sup> Anti, antibiotics; Anti (CON), the microbiota-depleted mice that were originally fed control diet; Anti (Cd), the microbiota-depleted mice that were originally fed control diet treated CdCl<sub>2</sub>; Anti (Mel+Cd), the microbiota-depleted mice that were originally fed control diet treated melatonin and CdCl<sub>2</sub>; VCR, villous height/crypt depth ratio; DAO, diamine oxidase; TER, transepithelial electrical resistance; FD4, fluorescein isothiocyanate dextran (4 kDa); TNF- $\alpha$ , tumor necrosis factor  $\alpha$ ; IL, interleukin; LPS, lipopolysaccharide; T-AOC, total antioxidant capacity; MDA, malondialdehyde; SOD, superoxide dismutase; GSH-Px, glutathione peroxidase.

Table S15 Effects of melatonin supplementation on SCFAs and LPS concentrations in colonic contents in CdCl<sub>2</sub> treated mice for 10 weeks<sup>a</sup>.

| Item <sup>b</sup> | CON                | Cd                 | Mel+Cd             | SEM  | P value |
|-------------------|--------------------|--------------------|--------------------|------|---------|
| LPS, ng/mL        | 39.27 <sup>c</sup> | 72.48 <sup>a</sup> | 54.67 <sup>b</sup> | 2.86 | 0.009   |
| Acetate, µg/g     | 139.11             | 142.17             | 136.34             | 6.16 | 0.108   |
| Propionate, µg/g  | 80.91 <sup>a</sup> | 49.16 <sup>c</sup> | 62.91 <sup>b</sup> | 2.11 | 0.006   |
| Butyrate, µg/g    | 52.31 <sup>a</sup> | 32.18 <sup>c</sup> | 43.09 <sup>b</sup> | 1.28 | 0.011   |
| Isobutyrate, µg/g | 11.37              | 11.98              | 11.07              | 0.89 | 0.207   |
| Valerate, µg/g    | 9.68 <sup>a</sup>  | 5.32 <sup>c</sup>  | 7.02 <sup>b</sup>  | 0.54 | 0.006   |
| Isovalerate, µg/g | 8.47               | 8.04               | 8.36               | 0.47 | 0.231   |

<sup>a</sup> Mean value with their standard errors of the mean (SEM) (n = 12 per group). Within a row, mean values without a common letter differ ( $P < 0.05$ ).

<sup>b</sup> CON, mice in the control group fed a standard lab diet; Cd group, mice were challenged with CdCl<sub>2</sub> once a day by gavage; Mel+Cd group, the CdCl<sub>2</sub> mice were treated with melatonin; SCFAs, short-chain fatty acids; LPS, lipopolysaccharide.

Table S16 Effects of gut microbiota transplantation from donor mice fed CON, Cd, and Mel+Cd on SCFAs and LPS concentrations in colonic contents in antibiotics-treated mice for 10 weeks <sup>a</sup>.

| Item <sup>b</sup> | GMT (CON)          | GMT (Cd)           | GMT (Mel+Cd)        | SEM  | P value |
|-------------------|--------------------|--------------------|---------------------|------|---------|
| LPS, ng/mL        | 30.11 <sup>c</sup> | 59.68 <sup>a</sup> | 43.36 <sup>b</sup>  | 2.13 | 0.006   |
| Acetate, µg/g     | 123.57             | 127.63             | 122.31              | 5.08 | 0.204   |
| Propionate, µg/g  | 69.46 <sup>a</sup> | 38.36 <sup>c</sup> | 50.15 <sup>b</sup>  | 1.99 | 0.013   |
| Butyrate, µg/g    | 46.31 <sup>a</sup> | 32.56 <sup>b</sup> | 38.15 <sup>ab</sup> | 1.48 | 0.024   |
| Isobutyrate, µg/g | 9.85               | 9.67               | 9.71                | 0.59 | 0.183   |
| Valerate, µg/g    | 7.96 <sup>a</sup>  | 5.58 <sup>c</sup>  | 6.62 <sup>b</sup>   | 0.49 | 0.015   |
| Isovalerate, µg/g | 8.02               | 7.96               | 8.04                | 0.39 | 0.193   |

<sup>a</sup> Mean value with their standard errors of the mean (SEM) (n = 12 per group). Within a row, mean values without a common letter differ ( $P < 0.05$ ).

<sup>b</sup> GMT, gut microbiota transplantation; GMT(CON), the microbiota-depleted mice that were originally fed control diet received microbiota transplantations from donor mice fed control diet; GMT(Cd), the microbiota-depleted mice that were originally fed control diet received microbiota transplantations from donor mice treated CdCl<sub>2</sub>; GMT (Mel+Cd), the microbiota-depleted mice that were originally fed control diet received microbiota transplantations from donor mice in Mel + Cd groups; LPS, lipopolysaccharide; SCFAs, short-chain fatty acids.

Table S17 Effects of melatonin and CdCl<sub>2</sub> oral gavage on SCFAs and LPS concentrations in colonic contents in antibiotics-treated mice for 10 weeks <sup>a</sup>.

| Item <sup>b</sup> | Anti (CON) | Anti (Cd) | Anti (Mel+Cd) | SEM  | P value |
|-------------------|------------|-----------|---------------|------|---------|
| LPS, ng/mL        | 26.15      | 28.43     | 25.72         | 2.17 | 0.203   |
| Acetate, µg/g     | 119.57     | 112.69    | 116.53        | 7.83 | 0.105   |
| Propionate, µg/g  | 73.23      | 70.35     | 74.29         | 2.78 | 0.078   |
| Butyrate, µg/g    | 39.13      | 36.63     | 37.48         | 1.95 | 0.093   |
| Isobutyrate, µg/g | 8.95       | 9.02      | 8.92          | 0.59 | 0.116   |
| Valerate, µg/g    | 7.06       | 7.02      | 6.95          | 0.39 | 0.089   |
| Isovalerate, µg/g | 6.96       | 7.01      | 6.94          | 0.51 | 0.115   |

<sup>a</sup> Mean value with their standard errors of the mean (SEM) (n = 12 per group). Within a row, mean values without a common letter differ ( $P < 0.05$ ).

<sup>b</sup> Anti, antibiotics; Anti (CON), the microbiota-depleted mice that were originally fed control diet; Anti (Cd), the microbiota-depleted mice that were originally fed control diet treated CdCl<sub>2</sub>; Anti (Mel+Cd), the microbiota-depleted mice that were originally fed control diet treated melatonin and CdCl<sub>2</sub>; LPS, lipopolysaccharide; SCFAs, short-chain fatty acids.
